# Supplementary material
Source: PubMed Central journal article supplement (PMC3985697)
Supplement: bi4015314_si_002.pdf [file bi4015314_si_002.pdf]

## Supplementary Tables

| Table S1. Methyl resonance assignments for hDHFR complexes. |                          |                 |                |                 |                |                 |
|-------------------------------------------------------------|--------------------------|-----------------|----------------|-----------------|----------------|-----------------|
| Residue                                                     | hE:FOL:NADP <sup>+</sup> |                 | hE:NADPH       |                 | hE:THF         |                 |
|                                                             | <sup>1</sup> H           | <sup>13</sup> C | <sup>1</sup> H | <sup>13</sup> C | <sup>1</sup> H | <sup>13</sup> C |
| <b>MET 0-ε</b>                                              | 2.074                    | 16.850          | 2.078          | 16.845          | 2.070          | 16.840          |
| <b>VAL 1-γ1</b>                                             | 1.063                    | 20.533          | 1.023          | 21.270          | 0.988          | 21.556          |
| <b>VAL 1-γ2</b>                                             | 1.044                    | 20.048          | 1.028          | 20.756          | 0.939          | 20.467          |
| <b>LEU 4-δ1</b>                                             | #N/A                     | #N/A            | #N/A           | #N/A            | 0.766          | 24.795          |
| <b>LEU 4-δ2</b>                                             | #N/A                     | #N/A            | #N/A           | #N/A            | 0.731          | 24.917          |
| <b>ILE 7-δ1</b>                                             | 0.610                    | 14.474          | 0.584          | 14.408          | 0.510          | 13.815          |
| <b>ILE 7-γ2</b>                                             | 1.498                    | 17.020          | 1.280          | 16.633          | 1.222          | 17.342          |
| <b>VAL 8-γ1</b>                                             | -0.093                   | 18.337          | -0.035         | 17.030          | -0.062         | 17.922          |
| <b>VAL 8-γ2</b>                                             | 0.508                    | 21.308          | 0.589          | 21.237          | 0.536          | 21.114          |
| <b>ALA 9-β</b>                                              | 1.434                    | 21.544          | 1.595          | 21.365          | 1.194          | 21.600          |
| <b>VAL 10-γ1</b>                                            | 0.616                    | 21.513          | 0.761          | 21.606          | 0.642          | 22.030          |
| <b>VAL 10-γ2</b>                                            | 0.867                    | 21.291          | 0.797          | 21.145          | 0.833          | 20.789          |
| <b>MET 14-ε</b>                                             | 2.233                    | 18.511          | 2.242          | 18.452          | 2.209          | 18.555          |
| <b>ILE 16-δ1</b>                                            | 0.271                    | 13.554          | 1.195          | 14.214          | 1.187          | 13.466          |
| <b>ILE 16-γ2</b>                                            | 1.020                    | 18.906          | 1.386          | 19.937          | 1.321          | 19.939          |
| <b>LEU 22-δ1</b>                                            | #N/A                     | #N/A            | #N/A           | #N/A            | #N/A           | #N/A            |
| <b>LEU 22-δ2</b>                                            | #N/A                     | #N/A            | #N/A           | #N/A            | 0.881          | 23.117          |
| <b>LEU 27-δ1</b>                                            | 0.097                    | 25.485          | 0.153          | 24.792          | 0.086          | 25.572          |
| <b>LEU 27-δ2</b>                                            | 0.655                    | 23.390          | 0.694          | 23.097          | 0.632          | 23.375          |
| <b>MET 37-ε</b>                                             | 1.828                    | 17.480          | 1.936          | 17.335          | 1.850          | 17.443          |
| <b>THR 38-γ2</b>                                            | -0.196                   | 20.819          | -0.139         | 20.507          | -0.250         | 20.345          |
| <b>THR 39-γ2</b>                                            | 1.189                    | 21.751          | 1.211          | 21.554          | 1.197          | 21.801          |
| <b>THR 40-γ2</b>                                            | 1.196                    | 20.704          | 1.211          | 20.666          | 1.186          | 20.737          |
| <b>VAL 43-γ1</b>                                            | 0.940                    | 21.127          | 0.963          | 21.039          | 0.917          | 21.147          |
| <b>VAL 43-γ2</b>                                            | 0.909                    | 20.465          | 0.931          | 20.366          | 0.888          | 20.502          |
| <b>LEU 49-δ1</b>                                            | #N/A                     | #N/A            | 0.867          | 25.540          | 0.833          | 25.168          |
| <b>LEU 49-δ2</b>                                            | #N/A                     | #N/A            | 0.798          | 26.816          | 0.749          | 26.984          |
| <b>VAL 50-γ1</b>                                            | 0.990                    | 23.053          | 0.921          | 22.919          | 0.933          | 22.998          |
| <b>VAL 50-γ2</b>                                            | 1.014                    | 21.484          | 1.088          | 20.445          | 0.955          | 21.535          |
| <b>ILE 51-δ1</b>                                            | 0.638                    | 14.364          | 0.606          | 14.107          | 0.611          | 14.193          |
| <b>ILE 51-γ2</b>                                            | 0.635                    | 16.445          | 0.628          | 16.393          | 0.734          | 17.079          |
| <b>MET 52-ε</b>                                             | 2.045                    | 17.710          | 2.147          | 17.585          | 2.027          | 17.697          |
| <b>THR 56-γ2</b>                                            | 1.356                    | 21.469          | 1.372          | 21.065          | 1.309          | 20.916          |
| <b>ILE 60-δ1</b>                                            | 0.238                    | 13.554          | 0.714          | 13.744          | 0.312          | 13.129          |
| <b>ILE 60-γ2</b>                                            | 0.156                    | 15.832          | 0.741          | 16.850          | 0.493          | 16.640          |
| <b>LEU 67-δ1</b>                                            | #N/A                     | #N/A            | #N/A           | #N/A            | #N/A           | #N/A            |
| <b>LEU 67-δ2</b>                                            | 0.717                    | 21.555          | 0.473          | 24.299          | 0.668          | 21.329          |
| <b>ILE 71-δ1</b>                                            | 0.728                    | 13.861          | 0.754          | 13.521          | 0.714          | 13.883          |

**Table S1.** Methyl resonance assignments for hDHFR complexes.

| Residue             | hE:FOL:NADP <sup>+</sup> |                 | hE:NADPH       |                 | hE:THF         |                 |
|---------------------|--------------------------|-----------------|----------------|-----------------|----------------|-----------------|
|                     | <sup>1</sup> H           | <sup>13</sup> C | <sup>1</sup> H | <sup>13</sup> C | <sup>1</sup> H | <sup>13</sup> C |
| ILE 71- $\gamma$ 2  | 1.059                    | 18.932          | 1.072          | 18.812          | 1.035          | 18.877          |
| LEU 73- $\delta$ 1  | #N/A                     | #N/A            | #N/A           | #N/A            | 0.731          | 23.798          |
| LEU 73- $\delta$ 2  | #N/A                     | #N/A            | 0.702          | 24.917          | 0.700          | 25.387          |
| VAL 74- $\gamma$ 1  | 0.527                    | 20.423          | 0.561          | 20.234          | 0.516          | 20.273          |
| VAL 74- $\gamma$ 2  | 0.128                    | 21.810          | 0.177          | 21.738          | 0.152          | 21.765          |
| LEU 75- $\delta$ 1  | 0.083                    | 26.482          | 0.089          | 26.283          | 0.864          | 25.452          |
| LEU 75- $\delta$ 2  | 0.164                    | 23.884          | 0.157          | 23.803          | 0.447          | 24.876          |
| LEU 79- $\delta$ 1  | 0.930                    | 25.374          | 0.968          | 25.403          | 0.885          | 25.517          |
| LEU 79- $\delta$ 2  | 1.086                    | 22.338          | 1.126          | 22.319          | 1.027          | 22.380          |
| ALA 86- $\beta$     | 0.227                    | 17.101          | 0.275          | 17.040          | 0.236          | 17.222          |
| LEU 89- $\delta$ 1  | 0.850                    | 24.952          | 0.869          | 25.035          | 0.812          | 24.705          |
| LEU 89- $\delta$ 2  | 0.454                    | 25.562          | 0.480          | 25.533          | 0.421          | 25.708          |
| LEU 93- $\delta$ 1  | #N/A                     | #N/A            | 0.844          | 23.487          | #N/A           | #N/A            |
| LEU 93- $\delta$ 2  | #N/A                     | #N/A            | 0.801          | 25.240          | #N/A           | #N/A            |
| ALA 96- $\beta$     | 1.451                    | 19.593          | 1.458          | 19.355          | 1.427          | 19.444          |
| LEU 97- $\delta$ 1  | 0.636                    | 25.017          | 0.687          | 23.960          | 0.654          | 25.139          |
| LEU 97- $\delta$ 2  | 0.700                    | 22.193          | 0.733          | 22.108          | 0.700          | 21.791          |
| LEU 99- $\delta$ 1  | 0.671                    | 24.029          | 0.719          | 23.936          | 0.719          | 23.904          |
| LEU 99- $\delta$ 2  | 0.451                    | 24.182          | 0.506          | 24.256          | 0.517          | 24.266          |
| THR 100- $\gamma$ 2 | 1.234                    | 21.716          | 1.256          | 21.606          | 1.160          | 21.532          |
| LEU 105- $\delta$ 1 | 0.426                    | 24.846          | 0.447          | 24.639          | 0.333          | 24.723          |
| LEU 105- $\delta$ 2 | 0.738                    | 23.739          | 0.701          | 23.770          | 0.673          | 23.749          |
| ALA 106- $\beta$    | 1.309                    | 18.489          | 1.355          | 18.401          | 1.280          | 18.477          |
| VAL 109- $\gamma$ 1 | 0.907                    | 22.131          | 0.914          | 22.076          | 0.881          | 22.330          |
| VAL 109- $\gamma$ 2 | 0.983                    | 23.675          | 1.000          | 23.625          | 0.961          | 23.541          |
| MET 111- $\epsilon$ | 2.158                    | 16.944          | 2.186          | 16.622          | 2.133          | 16.728          |
| VAL 112- $\gamma$ 1 | 0.809                    | 22.379          | 0.824          | 22.339          | 0.793          | 22.380          |
| VAL 112- $\gamma$ 2 | 0.970                    | 21.873          | 0.988          | 21.653          | 0.937          | 21.820          |
| ILE 114- $\delta$ 1 | 0.833                    | 13.205          | 0.845          | 13.031          | 0.825          | 13.883          |
| ILE 114- $\gamma$ 2 | 1.012                    | 19.689          | 1.017          | 19.163          | 0.946          | 19.766          |
| VAL 115- $\gamma$ 1 | 1.345                    | 22.074          | 1.090          | 21.954          | 1.217          | 22.253          |
| VAL 115- $\gamma$ 2 | 1.310                    | 20.780          | 1.111          | 19.812          | 1.100          | 21.497          |
| VAL 120- $\gamma$ 1 | 0.740                    | 21.949          | 0.760          | 22.596          | 0.799          | 22.093          |
| VAL 120- $\gamma$ 2 | 0.852                    | 22.253          | 0.946          | 22.636          | 0.975          | 22.053          |
| ALA 124- $\beta$    | 1.504                    | 19.269          | 1.543          | 18.639          | 1.472          | 19.107          |
| MET 125- $\epsilon$ | 1.489                    | 16.560          | 1.703          | 16.811          | 1.598          | 16.714          |
| LEU 131- $\delta$ 1 | #N/A                     | #N/A            | #N/A           | #N/A            | #N/A           | #N/A            |
| LEU 131- $\delta$ 2 | #N/A                     | #N/A            | #N/A           | #N/A            | #N/A           | #N/A            |
| LEU 133- $\delta$ 1 | 0.152                    | 24.872          | 0.382          | 24.744          | 0.192          | 25.089          |
| LEU 133- $\delta$ 2 | 0.649                    | 24.429          | 0.613          | 24.118          | 0.675          | 24.387          |

**Table S1.** Methyl resonance assignments for hDHFR complexes.

| Residue             | hE:FOL:NADP <sup>+</sup> |                 | hE:NADPH       |                 | hE:THF         |                 |
|---------------------|--------------------------|-----------------|----------------|-----------------|----------------|-----------------|
|                     | <sup>1</sup> H           | <sup>13</sup> C | <sup>1</sup> H | <sup>13</sup> C | <sup>1</sup> H | <sup>13</sup> C |
| VAL 135- $\gamma$ 1 | 0.527                    | 20.687          | 0.666          | 21.052          | 0.520          | 20.775          |
| VAL 135- $\gamma$ 2 | 0.604                    | 20.670          | 0.672          | 21.290          | 0.584          | 20.738          |
| THR 136- $\gamma$ 2 | 0.790                    | 23.322          | 0.863          | 22.946          | 0.787          | 23.270          |
| ILE 138- $\delta$ 1 | -0.884                   | 10.230          | -0.813         | 10.594          | -0.921         | 10.399          |
| ILE 138- $\gamma$ 2 | 0.530                    | 17.067          | 0.677          | 17.447          | 0.544          | 17.424          |
| MET 139- $\epsilon$ | 2.005                    | 16.680          | 2.035          | 16.407          | 1.978          | 16.622          |
| THR 146- $\gamma$ 2 | 1.393                    | 21.529          | 1.394          | 21.204          | 1.326          | 20.841          |
| ILE 151- $\delta$ 1 | 0.224                    | 12.890          | 0.329          | 12.801          | 0.223          | 12.804          |
| ILE 151- $\gamma$ 2 | 0.087                    | 17.161          | -0.022         | 16.723          | 0.016          | 17.198          |
| LEU 153- $\delta$ 1 | 1.099                    | 25.613          | 1.122          | 25.473          | 1.062          | 25.694          |
| LEU 153- $\delta$ 2 | 0.957                    | 22.215          | 1.019          | 22.213          | 0.980          | 22.500          |
| LEU 158- $\delta$ 1 | 0.295                    | 22.228          | 0.339          | 22.081          | 0.273          | 22.149          |
| LEU 158- $\delta$ 2 | 0.778                    | 26.030          | 0.815          | 25.936          | 0.761          | 26.059          |
| LEU 159- $\delta$ 1 | 1.007                    | 25.834          | 1.000          | 25.812          | 0.967          | 25.822          |
| LEU 159- $\delta$ 2 | 1.012                    | 22.463          | 1.003          | 22.636          | 0.965          | 22.791          |
| VAL 165- $\gamma$ 1 | 1.049                    | 21.732          | 1.057          | 21.560          | 1.021          | 21.764          |
| VAL 165- $\gamma$ 2 | 1.324                    | 22.449          | 1.344          | 22.353          | 1.310          | 22.452          |
| LEU 166- $\delta$ 1 | 1.071                    | 25.536          | 1.092          | 25.131          | 1.036          | 25.819          |
| LEU 166- $\delta$ 2 | 0.991                    | 22.734          | 1.025          | 23.210          | 1.005          | 22.782          |
| VAL 169- $\gamma$ 1 | 0.887                    | 21.590          | 0.920          | 21.516          | 0.859          | 21.640          |
| VAL 169- $\gamma$ 2 | 1.007                    | 22.754          | 1.037          | 22.622          | 0.994          | 22.787          |
| ILE 175- $\delta$ 1 | 1.044                    | 14.261          | 1.078          | 13.852          | 1.008          | 13.913          |
| ILE 175- $\gamma$ 2 | 0.825                    | 18.430          | 0.895          | 18.332          | 0.837          | 18.435          |
| VAL 181- $\gamma$ 1 | -0.246                   | 20.029          | -0.274         | 19.927          | -0.306         | 20.095          |
| VAL 181- $\gamma$ 2 | 0.566                    | 21.246          | 0.551          | 21.178          | 0.491          | 21.204          |

#N/A – resonances not assignable due to overlap ambiguity.

**Table S2.** Average over all complexes for Ile, Thr, Val  $^3J$  and rotamer populations <sup>a</sup>

| Residue                   | $^3J_{C\gamma N}$ | $^3J_{C\gamma CO}$ | <b>P</b> <sub>-60</sub>   | <b>P</b> <sub>+60</sub>   | <b>P</b> <sub>180</sub>   | $\chi_1$ <sup>b</sup> |
|---------------------------|-------------------|--------------------|---------------------------|---------------------------|---------------------------|-----------------------|
| Ile7                      | 1.18 (0.51)       | 1.20 (0.43)        | 0.32 (0.00 - 0.75)        | 0.17 (0.00 - 0.32)        | 0.50 (0.00 - 1.00)        | 189 (6)               |
| Ile16                     | 0.59 (0.60)       | 3.66 (0.28)        | 0.05 (0.00 - 0.14)        | <b>0.95</b> (0.85 - 1.00) | 0.00 (0.00 - 0.15)        | 60 (7)                |
| Ile51                     | 1.75 (0.21)       | 0.78 (0.44)        | <b>0.81</b> (0.56 - 0.95) | 0.09 (0.00 - 0.22)        | 0.11 (0.00 - 0.44)        | -67 (5)               |
| Ile60 <sup>d</sup>        |                   |                    |                           |                           |                           | -60 (4)               |
| Ile71                     | 2.08 (0.36)       | 0.65 (0.57)        | <b>1.00</b> (0.73 - 1.00) | 0.00 (0.00 - 0.20)        | 0.00 (0.00 - 0.27)        | -56 (7)               |
| Ile114 <sup>d</sup>       |                   |                    |                           |                           |                           | -61 (12)              |
| Ile138                    | 1.77 (0.29)       | 0.57 (0.60)        | <b>0.78</b> (0.50 - 1.00) | 0.02 (0.00 - 0.19)        | 0.20 (0.00 - 0.50)        | -63 (10)              |
| Ile151                    | 2.07 (0.25)       | 1.09 (0.82)        | <b>1.00</b> (0.80 - 1.00) | 0.00 (0.00 - 0.20)        | 0.00 (0.00 - 0.18)        | -60 (2)               |
| Ile175                    | 1.97 (0.30)       | 1.03 (0.60)        | <b>0.95</b> (0.68 - 1.00) | 0.05 (0.00 - 0.27)        | 0.00 (0.00 - 0.32)        | -62 (2)               |
| Thr38                     | 0.26 (0.37)       | 3.25 (0.24)        | 0.00 (0.00 - 0.00)        | <b>0.95</b> (0.84 - 1.00) | 0.05 (0.00 - 0.16)        | 62 (6)                |
| Thr39                     | 0.92 (0.28)       | 1.52 (0.14)        | 0.36 (0.17 - 0.56)        | 0.32 (0.19 - 0.46)        | 0.31 (0.02 - 0.61)        | -46 (14)              |
| Thr40                     | 1.53 (0.16)       | 0.41 (0.35)        | <b>0.89</b> (0.74 - 1.00) | 0.06 (0.00 - 0.15)        | 0.05 (0.00 - 0.21)        | -57 (2)               |
| Thr56                     | 1.51 (0.11)       | 0.61 (0.43)        | <b>0.85</b> (0.73 - 0.98) | 0.13 (0.00 - 0.27)        | 0.02 (0.00 - 0.18)        | -63 (5)               |
| Thr100                    | 1.04 (0.18)       | 2.22 (0.17)        | 0.34 (0.21 - 0.41)        | <b>0.64</b> (0.52 - 0.69) | 0.02 (0.00 - 0.23)        | 65 (5)                |
| Thr136                    | 1.63 (0.07)       | 0.69 (0.46)        | <b>0.97</b> (0.87 - 1.00) | 0.03 (0.00 - 0.13)        | 0.00 (0.00 - 0.07)        | -58 (3)               |
| Thr146                    | 1.29 (0.25)       | 0.96 (0.56)        | <b>0.67</b> (0.44 - 0.90) | 0.21 (0.00 - 0.36)        | 0.12 (0.00 - 0.44)        | *                     |
| Val1-C $\gamma$ 1         | 0.97 (0.51)       | 1.96 (0.07)        |                           |                           |                           |                       |
| C $\gamma$ 2              | 0.65 (0.27)       | 1.93 (0.43)        | 0.43 (0.39 - 0.47)        | 0.17 (0.02 - 0.32)        | 0.40 (0.29 - 0.52)        | 179 (17)              |
| Val8-C $\gamma$ 1         | 0.67 (0.57)       | 1.41 (0.34)        |                           |                           |                           |                       |
| C $\gamma$ 2              | 1.88 (0.51)       | 1.20 (0.42)        | 0.21 (0.03 - 0.35)        | <b>0.67</b> (0.36 - 0.97) | 0.12 (0.00 - 0.29)        | 68 (2)                |
| Val10-C $\gamma$ 1        | 0.89 (0.31)       | 2.60 (0.21)        |                           |                           |                           |                       |
| C $\gamma$ 2              | 1.02 (0.19)       | 0.85 (0.66)        | <b>0.62</b> (0.54 - 0.69) | 0.21 (0.07 - 0.32)        | 0.17 (0.14 - 0.33)        | *                     |
| Val43-C $\gamma$ 1        | 1.51 (0.12)       | 1.27 (0.11)        |                           |                           |                           |                       |
| C $\gamma$ 2              | 0.76 (0.19)       | 2.77 (0.04)        | 0.23 (0.19 - 0.27)        | 0.11 (0.06 - 0.15)        | <b>0.66</b> (0.65 - 0.67) | 178 (3)               |
| Val50-C $\gamma$ 1        |                   |                    |                           |                           |                           |                       |
| C $\gamma$ 2 <sup>d</sup> |                   |                    |                           |                           |                           | *                     |
| Val74-C $\gamma$ 1        | 1.82 (0.11)       | 0.46 (0.31)        |                           |                           |                           |                       |
| C $\gamma$ 2              | 0.20 (0.23)       | 3.15 (0.15)        | 0.09 (0.08 - 0.27)        | 0.11 (0.00 - 0.11)        | <b>0.80</b> (0.73 - 0.84) | 180 (5)               |
| Val109-C $\gamma$ 1       | 1.47 (0.32)       | 0.94 (0.35)        |                           |                           |                           |                       |
| C $\gamma$ 2              | 0.38 (0.16)       | 3.05 (0.15)        | 0.15 (0.04 - 0.21)        | 0.10 (0.00 - 0.24)        | <b>0.75</b> (0.72 - 0.79) | 177 (9)               |
| Val112-C $\gamma$ 1       | 1.80 (0.17)       | 0.55 (0.29)        |                           |                           |                           |                       |
| C $\gamma$ 2              | 0.42 (0.11)       | 3.45 (0.26)        | 0.03 (0.01 - 0.06)        | 0.09 (0.00 - 0.19)        | <b>0.88</b> (0.80 - 0.96) | 177 (2)               |
| Val115-C $\gamma$ 1       |                   |                    |                           |                           |                           |                       |
| C $\gamma$ 2 <sup>d</sup> |                   |                    |                           |                           |                           | -53 (7)               |
| Val120-C $\gamma$ 1       | 1.89 (0.20)       | 0.92 (0.54)        |                           |                           |                           |                       |
| C $\gamma$ 2              | 0.63 (0.31)       | 3.09 (0.19)        | 0.16 (0.09 - 0.22)        | 0.07 (0.00 - 0.19)        | <b>0.77</b> (0.72 - 0.83) | *                     |
| Val135-C $\gamma$ 1       | 1.84 (0.23)       | 0.71 (0.61)        |                           |                           |                           |                       |
| C $\gamma$ 2              | 0.31 (0.35)       | 2.90 (0.34)        | 0.15 (0.09 - 0.40)        | 0.12 (0.00 - 0.12)        | <b>0.73</b> (0.60 - 0.91) | 182 (7)               |
| Val165-C $\gamma$ 1       | 1.60 (0.13)       | 0.77 (0.73)        |                           |                           |                           |                       |
| C $\gamma$ 2              | 0.89 (0.30)       | 3.60 (0.08)        | 0.00 (0.00 - 0.06)        | 0.08 (0.00 - 0.17)        | <b>0.92</b> (0.83 - 0.94) | 178 (4)               |
| Val169-C $\gamma$ 1       | 1.80 (0.15)       | 1.00 (0.26)        |                           |                           |                           |                       |
| C $\gamma$ 2 <sup>c</sup> |                   |                    | 0.16 (0.05 - 0.24)        | 0.00 (0.00 - 0.17)        | <b>0.84</b> (0.73 - 0.95) | *                     |
| Val181-C $\gamma$ 1       | 1.56 (0.23)       | 0.16 (0.18)        |                           |                           |                           |                       |
| C $\gamma$ 2              | 0.78 (0.36)       | 3.44 (0.18)        | 0.00 (0.00 - 0.00)        | 0.15 (0.08 - 0.25)        | <b>0.85</b> (0.75 - 0.92) | 189 (2)               |

<sup>a</sup> Coupling values (in Hz) represent an average over all complexes with standard deviations in parentheses; complexes with errors larger than 1 Hz were excluded from the average. Rotamer populations were fit by minimizing the squared difference between measured and calculated  $^3J_{C\gamma N}$  and  $^3J_{C\gamma CO}$  couplings for each residue:  $\sum (1/\sigma_{J_{meas}})^2 (J_{calc} - J_{meas})^2$ , where  $\sigma$  is the standard deviation; **P**<sub>major</sub> is shown in bold. Ranges for populations given in parentheses were calculated using  $^3J \pm \sigma$ . The populations for Val residues represents a simultaneous fit of C $\gamma$ 1 and C $\gamma$ 2 couplings when both sets are available. <sup>b</sup> Average  $\chi_1$  angles from the X-ray structures with standard deviations in parentheses; \* indicates multiple rotamer conformations present in the X-ray structures. <sup>c</sup>  $^3J$  measurement not available due to overly broad resonance or overlap. <sup>d</sup> The coupling constants indicate that the residue undergoes different rotamer averaging in one or more complexes of hDHFR.

**Table S3.** Ile, Thr, Val  $^3J$  and rotamer populations for hDHFR:FOL:NADP<sup>+</sup> <sup>a</sup>

| Residue                   | $^3J_{C\gamma N}$ | $^3J_{C\gamma CO}$ | P <sub>-60</sub>          | P <sub>+60</sub>          | P <sub>180</sub>          | $\chi_1$ <sup>b</sup> |
|---------------------------|-------------------|--------------------|---------------------------|---------------------------|---------------------------|-----------------------|
| Ile7                      | 0.61 (0.33)       | 0.63 (1.10)        | 0.00 (0.00 - 0.19)        | 0.13 (0.02 - 0.97)        | <b>0.87</b> (0.03 - 0.98) | 187                   |
| Ile16                     | 0.58 (0.65)       | 3.32 (0.83)        | 0.15 (0.00 - 0.41)        | <b>0.85</b> (0.56 - 1.00) | 0.00 (0.00 - 0.44)        | 66                    |
| Ile51                     | 1.58 (0.12)       | 0.70 (0.64)        | <b>0.62</b> (0.48 - 0.81) | 0.04 (0.00 - 0.25)        | 0.34 (0.00 - 0.52)        | -63                   |
| Ile60                     | 1.71 (0.42)       | 1.12 (0.43)        | <b>0.81</b> (0.32 - 1.00) | 0.19 (0.00 - 0.31)        | 0.00 (0.00 - 0.67)        | -61                   |
| Ile71                     | 1.81 (0.26)       | 0.84 (0.84)        | <b>0.88</b> (0.56 - 1.00) | 0.11 (0.00 - 0.30)        | 0.00 (0.00 - 0.44)        | -62                   |
| Ile114                    | 2.03 (0.36)       | 0.30 (0.51)        | <b>1.00</b> (0.69 - 1.00) | 0.00 (0.00 - 0.09)        | 0.00 (0.00 - 0.31)        | -52                   |
| Ile138                    | 1.55 (0.43)       | 0.53 (0.46)        | <b>0.57</b> (0.16 - 0.98) | 0.00 (0.00 - 0.09)        | 0.43 (0.00 - 0.84)        | -57                   |
| Ile151                    | 1.85 (0.35)       | 0.98 (0.16)        | <b>0.85</b> (0.56 - 0.95) | 0.15 (0.05 - 0.18)        | 0.00 (0.00 - 0.37)        | -59                   |
| Ile175                    | 1.72 (0.23)       | 0.53 (0.46)        | <b>0.73</b> (0.51 - 0.94) | 0.00 (0.00 - 0.13)        | 0.27 (0.00 - 0.49)        | -61                   |
| Thr38                     | 0.78 (1.07)       | 3.45 (0.15)        | 0.00 (0.00 - 0.02)        | <b>1.00</b> (0.97 - 1.00) | 0.00 (0.00 - 0.03)        | 60                    |
| Thr39                     | 0.90 (0.17)       | 1.48 (0.13)        | 0.35 (0.23 - 0.48)        | 0.30 (0.20 - 0.40)        | 0.34 (0.16 - 0.53)        | -55                   |
| Thr40                     | 1.42 (0.25)       | 0.66 (0.58)        | <b>0.79</b> (0.55 - 1.00) | 0.12 (0.00 - 0.28)        | 0.09 (0.00 - 0.35)        | -59                   |
| Thr56                     | 1.44 (0.16)       | 0.91 (0.95)        | <b>0.77</b> (0.54 - 0.94) | 0.23 (0.00 - 0.46)        | 0.00 (0.00 - 0.27)        | -67                   |
| Thr100                    | 0.92 (0.23)       | 2.18 (0.08)        | 0.27 (0.12 - 0.40)        | <b>0.59</b> (0.49 - 0.66) | 0.14 (0.00 - 0.37)        | 64                    |
| Thr136                    | 1.68 (0.23)       | 0.36 (0.63)        | <b>1.00</b> (0.77 - 1.00) | 0.00 (0.00 - 0.23)        | 0.00 (0.00 - 0.14)        | -60                   |
| Thr146                    | 1.08 (0.12)       | 0.66 (0.23)        | <b>0.58</b> (0.47 - 0.67) | 0.02 (0.00 - 0.15)        | 0.40 (0.23 - 0.50)        | -52                   |
| Val1-C $\gamma$ 1         | 0.44 (0.57)       | 1.87 (0.24)        |                           |                           |                           |                       |
| C $\gamma$ 2              | 0.63 (0.75)       | 1.58 (0.41)        | 0.39 (0.30 - 0.48)        | 0.32 (0.11 - 0.52)        | 0.29 (0.18 - 0.41)        | 167                   |
| Val8-C $\gamma$ 1         | 0.66 (0.59)       | 1.65 (0.13)        |                           |                           |                           |                       |
| C $\gamma$ 2              | 1.30 (0.16)       | 1.08 (0.46)        | 0.31 (0.26 - 0.36)        | <b>0.49</b> (0.36 - 0.58) | 0.21 (0.16 - 0.30)        | 68                    |
| Val10-C $\gamma$ 1        | 0.84 (0.17)       | 2.42 (0.09)        |                           |                           |                           |                       |
| C $\gamma$ 2              | 1.11 (0.29)       | 0.80 (0.22)        | <b>0.55</b> (0.51 - 0.58) | 0.36 (0.30 - 0.43)        | 0.09 (0.06 - 0.13)        | 64,<br>182            |
| Val43-C $\gamma$ 1        | 1.37 (0.05)       | 1.31 (0.04)        |                           |                           |                           |                       |
| C $\gamma$ 2              | 0.63 (0.18)       | 2.74 (0.10)        | 0.24 (0.22 - 0.26)        | 0.12 (0.08 - 0.16)        | <b>0.64</b> (0.61 - 0.66) | 180                   |
| Val50-C $\gamma$ 1        | 1.06 (0.10)       | 2.42 (0.01)        |                           |                           |                           |                       |
| C $\gamma$ 2              | 1.13 (0.04)       | 1.93 (0.02)        | <b>0.57</b> (0.56 - 0.57) | 0.07 (0.06 - 0.08)        | 0.36 (0.35 - 0.37)        | -68                   |
| Val74-C $\gamma$ 1        | 1.71 (0.06)       | 0.65 (0.49)        |                           |                           |                           |                       |
| C $\gamma$ 2              | 0.40 (0.40)       | 3.30 (0.12)        | 0.00 (0.00 - 0.19)        | 0.16 (0.00 - 0.20)        | <b>0.84</b> (0.80 - 0.87) | 178                   |
| Val109-C $\gamma$ 1       | 1.32 (0.21)       | 1.06 (0.18)        |                           |                           |                           |                       |
| C $\gamma$ 2              | 0.48 (0.43)       | 2.94 (0.09)        | 0.17 (0.11 - 0.23)        | 0.11 (0.03 - 0.20)        | <b>0.72</b> (0.70 - 0.74) | 170                   |
| Val112-C $\gamma$ 1       | 1.82 (0.22)       | 1.05 (1.08)        |                           |                           |                           |                       |
| C $\gamma$ 2              | 0.30 (0.28)       | 3.41 (0.03)        | 0.14 (0.13 - 0.15)        | 0.00 (0.00 - 0.00)        | <b>0.86</b> (0.85 - 0.87) | 177                   |
| Val115-C $\gamma$ 1       | 0.83 (0.72)       | 3.30 (0.08)        |                           |                           |                           |                       |
| C $\gamma$ 2              | 0.23 (0.40)       | 0.67 (0.82)        | <b>0.83</b> (0.81 - 0.87) | 0.12 (0.00 - 0.12)        | 0.05 (0.05 - 0.19)        | -54                   |
| Val120-C $\gamma$ 1       | 1.92 (0.25)       | 1.24 (0.21)        |                           |                           |                           |                       |
| C $\gamma$ 2              | 0.85 (0.65)       | 3.22 (0.30)        | 0.20 (0.12 - 0.20)        | 0.00 (0.00 - 0.12)        | <b>0.80</b> (0.72 - 0.88) | 72                    |
| Val135-C $\gamma$ 1       | 1.68 (0.22)       | 0.91 (0.24)        |                           |                           |                           |                       |
| C $\gamma$ 2              | 0.68 (0.43)       | 3.27 (0.11)        | 0.13 (0.04 - 0.15)        | 0.05 (0.00 - 0.16)        | <b>0.82</b> (0.80 - 0.85) | 178                   |
| Val165-C $\gamma$ 1       | 1.74 (0.20)       | 1.26 (0.25)        |                           |                           |                           |                       |
| C $\gamma$ 2              | 0.55 (0.48)       | 3.56 (0.10)        | 0.09 (0.06 - 0.13)        | 0.00 (0.00 - 0.00)        | <b>0.91</b> (0.87 - 0.94) | 180                   |
| Val169-C $\gamma$ 1       | 1.75 (0.16)       | 1.11 (0.17)        |                           |                           |                           |                       |
| C $\gamma$ 2 <sup>c</sup> |                   |                    | 0.19 (0.11 - 0.24)        | 0.00 (0.00 - 0.16)        | <b>0.81</b> (0.70 - 0.89) | 177                   |
| Val181-C $\gamma$ 1       | 1.71 (0.09)       | 0.31 (0.27)        |                           |                           |                           |                       |
| C $\gamma$ 2              | 0.59 (0.65)       | 3.33 (0.16)        | 0.00 (0.00 - 0.16)        | 0.17 (0.00 - 0.21)        | <b>0.83</b> (0.79 - 0.89) | 187                   |

<sup>a</sup> Coupling values (in Hz) represent an average over three or more measurements with standard deviations in parentheses. Rotamer populations were fit by minimizing the squared difference between measured and calculated  $^3J_{C\gamma N}$  and  $^3J_{C\gamma CO}$  couplings for each residue:  $\Sigma(1/\sigma_{\text{meas}})^2 (J_{\text{calc}} - J_{\text{meas}})^2$ , where  $\sigma$  is the standard deviation; p<sub>major</sub> is shown in bold. Ranges for populations given in parentheses were calculated using  $^3J \pm \sigma$ . The populations for Val residues represents a simultaneous fit of C $\gamma$ 1 and C $\gamma$ 2 couplings when both sets are available. <sup>b</sup>  $\chi_1$  angles from the X-ray structure (4M6K). <sup>c</sup>  $^3J$  measurement not available due to overly broad resonance or overlap.

**Table S4.** Ile, Thr, Val  $^3J$  and rotamer populations for hDHF:THF:NADP $^{+a}$ 

| Residue                        | $^3J_{C\gamma N}$ | $^3J_{C\gamma CO}$ | <b>P</b> <sub>-60</sub>   | <b>P</b> <sub>+60</sub>   | <b>P</b> <sub>180</sub>   | $\chi_1^b$ |
|--------------------------------|-------------------|--------------------|---------------------------|---------------------------|---------------------------|------------|
| Ile7                           | 1.59 (0.72)       | 1.52 (0.01)        | <b>0.68</b> (0.07 - 0.69) | 0.32 (0.25 - 0.32)        | 0.00 (0.00 - 0.68)        | 184        |
| Ile16                          | 0.82 (1.42)       | 3.62 (0.49)        | 0.06 (0.00 - 0.22)        | <b>0.94</b> (0.77 - 1.00) | 0.00 (0.00 - 0.23)        | 62         |
| Ile51                          | 1.65 (0.36)       | 0.38 (0.54)        | <b>0.67</b> (0.32 - 1.00) | 0.00 (0.00 - 0.08)        | 0.33 (0.00 - 0.68)        | -64        |
| Ile60                          | 1.61 (0.83)       | 0.97 (1.37)        | <b>0.71</b> (0.00 - 1.00) | 0.14 (0.00 - 0.53)        | 0.15 (0.00 - 0.75)        | -58        |
| Ile71 <sup>d</sup>             | 1.94 (0.26)       | 0                  | <b>0.94</b> (0.70 - 1.00) | 0.00 (0.00 - 0.00)        | 0.06 (0.00 - 0.30)        | -56        |
| Ile114 <sup>d</sup>            | 2.02 (0.42)       | 0                  | <b>1.00</b> (0.62 - 1.00) | 0.00 (0.00 - 0.00)        | 0.00 (0.00 - 0.38)        | -53        |
| Ile138                         | 2.10 (0.12)       | 1.19 (0.48)        | <b>1.00</b> (0.92 - 1.00) | 0.00 (0.00 - 0.08)        | 0.00 (0.00 - 0.00)        | -56        |
| Ile151                         | 1.86 (0.33)       | 1.44 (0.02)        | <b>0.71</b> (0.70 - 0.72) | 0.29 (0.28 - 0.30)        | 0.00 (0.00 - 0.00)        | -59        |
| Ile175                         | 1.79 (0.24)       | 0.50 (0.18)        | <b>0.80</b> (0.58 - 1.00) | 0.00 (0.00 - 0.03)        | 0.20 (0.00 - 0.42)        | -62        |
| Thr38                          | 0.52 (0.68)       | 2.99 (0.23)        | 0.00 (0.00 - 0.19)        | <b>0.83</b> (0.73 - 0.95) | 0.17 (0.00 - 0.27)        | 56         |
| Thr39                          | 1.12 (0.27)       | 1.54 (0.02)        | 0.49 (0.32 - 0.58)        | 0.39 (0.31 - 0.44)        | 0.12 (0.00 - 0.37)        | -47        |
| Thr40                          | 1.65 (0.16)       | 0.16 (0.23)        | <b>1.00</b> (0.87 - 1.00) | 0.00 (0.00 - 0.04)        | 0.00 (0.00 - 0.12)        | -58        |
| Thr56                          | 1.59 (0.63)       | 0.31 (0.43)        | <b>0.94</b> (0.49 - 1.00) | 0.03 (0.00 - 0.03)        | 0.03 (0.00 - 0.50)        | -65        |
| Thr100                         | 0.95 (0.22)       | 2.07 (0.37)        | 0.31 (0.12 - 0.50)        | <b>0.55</b> (0.34 - 0.70) | 0.14 (0.00 - 0.44)        | 66         |
| Thr136                         | 1.58 (0.39)       | 1.01 (0.04)        | <b>0.74</b> (0.59 - 0.75) | 0.26 (0.18 - 0.27)        | 0.00 (0.00 - 0.21)        | -58        |
| Thr146                         | 1.19 (0.28)       | 0.61 (0.08)        | <b>0.65</b> (0.48 - 0.84) | 0.04 (0.00 - 0.15)        | 0.31 (0.03 - 0.52)        | 55, -59    |
| Val1-C $\gamma$ 1              | 0.68 (0.57)       | 1.98 (0.03)        |                           |                           |                           |            |
| C $\gamma$ 2                   | 1.04 (0.66)       | 1.55 (0.18)        | 0.42 (0.41 - 0.44)        | 0.29 (0.23 - 0.37)        | 0.28 (0.23 - 0.33)        | 191        |
| Val8-C $\gamma$ 1 <sup>d</sup> | 0                 | 1.17 (0.02)        |                           |                           |                           |            |
| C $\gamma$ 2                   | 2.17 (0.48)       | 1.14 (0.36)        | 0.13 (0.12 - 0.15)        | <b>0.87</b> (0.66 - 0.88) | 0.00 (0.00 - 0.19)        | 69         |
| Val10-C $\gamma$ 1             | 1.22 (0.43)       | 2.44 (0.05)        |                           |                           |                           |            |
| C $\gamma$ 2                   | 1.24 (0.20)       | 1.00 (0.36)        | <b>0.55</b> (0.53 - 0.58) | 0.33 (0.21 - 0.44)        | 0.12 (0.04 - 0.21)        | -60, 62    |
| Val43-C $\gamma$ 1             | 1.45 (0.06)       | 1.41 (0.02)        |                           |                           |                           |            |
| C $\gamma$ 2                   | 0.89 (0.22)       | 2.72 (0.03)        | 0.28 (0.27 - 0.28)        | 0.08 (0.07 - 0.10)        | <b>0.64</b> (0.63 - 0.65) | 180        |
| Val50-C $\gamma$ 1             | 1.03 (0.16)       | 2.36 (0.14)        |                           |                           |                           |            |
| C $\gamma$ 2                   | 1.01 (0.16)       | 1.86 (0.02)        | <b>0.55</b> (0.50 - 0.60) | 0.09 (0.04 - 0.14)        | 0.36 (0.36 - 0.36)        | -72, 177   |
| Val74-C $\gamma$ 1             | 1.82 (0.17)       | 0.51 (0.72)        |                           |                           |                           |            |
| C $\gamma$ 2                   | 0.40 (0.38)       | 3.24 (0.19)        | 0.11 (0.00 - 0.13)        | 0.07 (0.00 - 0.23)        | <b>0.82</b> (0.77 - 0.91) | 177        |
| Val109-C $\gamma$ 1            | 1.40 (0.30)       | 1.04 (0.18)        |                           |                           |                           |            |
| C $\gamma$ 2                   | 0.41 (0.37)       | 3.00 (0.04)        | 0.17 (0.11 - 0.22)        | 0.10 (0.03 - 0.16)        | <b>0.74</b> (0.73 - 0.74) | 176        |
| Val112-C $\gamma$ 1            | 1.63 (0.16)       | 0.89 (0.32)        |                           |                           |                           |            |
| C $\gamma$ 2                   | 0.88 (1.53)       | 3.70 (0.07)        | 0.05 (0.00 - 0.07)        | 0.00 (0.00 - 0.07)        | <b>0.95</b> (0.93 - 0.98) | 179        |
| Val115-C $\gamma$ 1            | 1.24 (0.47)       | 3.40 (0.03)        |                           |                           |                           |            |
| C $\gamma$ 2                   | 0.48 (0.83)       | 0.86 (1.22)        | <b>0.87</b> (0.85 - 0.88) | 0.00 (0.00 - 0.15)        | 0.13 (0.00 - 0.13)        | -59        |
| Val120-C $\gamma$ 1            | 1.84 (0.28)       | 0.85 (0.38)        |                           |                           |                           |            |
| C $\gamma$ 2 <sup>c</sup>      |                   |                    | 0.12 (0.00 - 0.22)        | 0.00 (0.00 - 0.28)        | <b>0.88</b> (0.69 - 1.00) | 186        |
| Val135-C $\gamma$ 1            | 1.82 (0.29)       | 0.10 (0.15)        |                           |                           |                           |            |
| C $\gamma$ 2                   | 0.24 (0.41)       | 3.10 (0.35)        | 0.00 (0.00 - 0.03)        | 0.19 (0.00 - 0.32)        | <b>0.81</b> (0.68 - 0.97) | 179        |
| Val165-C $\gamma$ 1            | 1.58 (0.29)       | 1.51 (0.10)        |                           |                           |                           |            |
| C $\gamma$ 2                   | 1.11 (0.53)       | 3.50 (0.06)        | 0.13 (0.11 - 0.15)        | 0.00 (0.00 - 0.00)        | <b>0.87</b> (0.85 - 0.89) | 181        |
| Val169-C $\gamma$ 1            | 1.62 (0.14)       | 0.69 (0.17)        |                           |                           |                           |            |
| C $\gamma$ 2 <sup>c</sup>      |                   |                    | 0.05 (0.00 - 0.12)        | 0.21 (0.06 - 0.34)        | <b>0.74</b> (0.64 - 0.84) | 179        |
| Val181-C $\gamma$ 1            | 1.68 (0.28)       | 0.33 (0.47)        |                           |                           |                           |            |
| C $\gamma$ 2                   | 0.83 (0.54)       | 3.26 (0.25)        | 0.00 (0.00 - 0.10)        | 0.18 (0.00 - 0.29)        | <b>0.82</b> (0.71 - 0.90) | 189        |

<sup>a</sup> Coupling values (in Hz) represent an average over three or more measurements with standard deviations in parentheses. Rotamer populations were fit by minimizing the squared difference between measured and calculated  $^3J_{C\gamma N}$  and  $^3J_{C\gamma CO}$  couplings for each residue:  $\Sigma(1/\sigma_{meas})^2 (J_{calc} - J_{meas})^2$ , where  $\sigma$  is the standard deviation;  $p_{major}$  is shown in bold. Ranges for populations given in parentheses were calculated using  $^3J \pm \sigma$ . The populations for Val residues represents a simultaneous fit of C $\gamma$ 1 and C $\gamma$ 2 couplings when both sets are available. <sup>b</sup>  $\chi_1$  angles from the X-ray structure (4M6L). <sup>c</sup>  $^3J$  measurement not available due to overly broad resonance or overlap. <sup>d</sup> 0 valued coupling indicates measurement at limit of detection due to low signal-to-noise.

**Table S5.** Ile, Thr, Val  $^3J$  and rotamer populations for hDHFH:NADPH <sup>a</sup>

| Residue                          | $^3J_{C\gamma N}$ | $^3J_{C\gamma CO}$ | <b>P</b> <sub>-60</sub>   | <b>P</b> <sub>+60</sub>   | <b>P</b> <sub>180</sub>   | $\chi_1^b$ |
|----------------------------------|-------------------|--------------------|---------------------------|---------------------------|---------------------------|------------|
| Ile7                             | 1.63 (1.52)       | 1.57 (1.36)        | <b>0.69</b> (0.00 - 0.94) | <b>0.31</b> (0.00 - 0.70) | <b>0.00</b> (0.00 - 1.00) | 187        |
| Ile16                            | 1.20 (0.12)       | 4.00 (0.20)        | <b>0.00</b> (0.00 - 0.06) | <b>1.00</b> (0.94 - 1.00) | <b>0.00</b> (0.00 - 0.00) | 61         |
| Ile51                            | 2.05 (0.57)       | 1.25 (0.77)        | <b>0.91</b> (0.50 - 1.00) | <b>0.09</b> (0.00 - 0.44) | <b>0.00</b> (0.00 - 0.50) | -64        |
| Ile60                            | 2.22 (1.32)       | 1.72 (0.64)        | <b>0.67</b> (0.01 - 1.00) | <b>0.33</b> (0.00 - 0.55) | <b>0.00</b> (0.00 - 0.90) | -56        |
| Ile71                            | 1.98 (1.12)       | 0.44 (0.44)        | <b>0.98</b> (0.00 - 1.00) | <b>0.00</b> (0.00 - 0.03) | <b>0.02</b> (0.00 - 0.99) | -61, -56   |
| Ile114                           | 1.43 (0.33)       | 1.28 (0.23)        | <b>0.59</b> (0.21 - 0.83) | <b>0.23</b> (0.11 - 0.29) | <b>0.18</b> (0.00 - 0.67) | -59        |
| Ile138                           | 1.65 (0.66)       | 1.35 (1.24)        | <b>0.76</b> (0.03 - 1.00) | <b>0.24</b> (0.00 - 0.63) | <b>0.00</b> (0.00 - 0.97) | -64, -48   |
| Ile151                           | 2.34 (0.24)       | 1.93 (0.09)        | <b>0.60</b> (0.56 - 0.64) | <b>0.40</b> (0.36 - 0.44) | <b>0.00</b> (0.00 - 0.00) | -62        |
| Ile175                           | 1.98 (0.11)       | 1.42 (0.51)        | <b>0.96</b> (0.87 - 1.00) | <b>0.04</b> (0.00 - 0.13) | <b>0.00</b> (0.00 - 0.00) | -61        |
| Thr38 <sup>c</sup>               |                   |                    |                           |                           |                           | 60         |
| Thr39                            | 1.14 (0.23)       | 1.36 (0.56)        | <b>0.52</b> (0.30 - 0.74) | <b>0.32</b> (0.04 - 0.50) | <b>0.15</b> (0.00 - 0.51) | -55        |
| Thr40                            | 1.11 (1.15)       | 0.61 (1.06)        | <b>0.60</b> (0.00 - 1.00) | <b>0.02</b> (0.00 - 0.34) | <b>0.38</b> (0.00 - 0.77) | -55        |
| Thr56 <sup>c</sup>               |                   |                    |                           |                           |                           | -66        |
| Thr100                           | 1.25 (0.40)       | 2.40 (0.48)        | <b>0.31</b> (0.14 - 0.50) | <b>0.69</b> (0.46 - 0.85) | <b>0.00</b> (0.00 - 0.27) | 69         |
| Thr136 <sup>c</sup>              |                   |                    |                           |                           |                           | -60        |
| Thr146                           | 1.65 (0.33)       | 1.38 (1.25)        | <b>0.86</b> (0.33 - 1.00) | <b>0.14</b> (0.00 - 0.67) | <b>0.00</b> (0.00 - 0.24) | -55, 192   |
| Val1-C $\gamma$ 1                | 1.57 (0.26)       | 1.95 (0.08)        |                           |                           |                           |            |
| C $\gamma$ 2                     | 0.43 (0.44)       | 2.26 (0.20)        | <b>0.44</b> (0.40 - 0.46) | <b>0.07</b> (0.00 - 0.16) | <b>0.50</b> (0.44 - 0.55) | #N/A       |
| Val8-C $\gamma$ 1                | 0.61 (0.59)       | 1.37 (1.19)        | <b>0.00</b> (0.00 - 0.59) | <b>0.90</b> (0.20 - 0.95) | <b>0.10</b> (0.05 - 0.21) | 66         |
| C $\gamma$ 2                     | 2.18 (0.31)       | 1.80 (0.61)        |                           |                           |                           |            |
| Val10-C $\gamma$ 1               | 0.61 (0.45)       | 2.72 (0.30)        |                           |                           |                           | 190,       |
| C $\gamma$ 2                     | 0.80 (0.74)       | 1.59 (0.06)        | <b>0.66</b> (0.56 - 0.72) | <b>0.07</b> (0.00 - 0.17) | <b>0.27</b> (0.26 - 0.28) | -64        |
| Val43-C $\gamma$ 1               | 1.62 (0.08)       | 1.20 (0.10)        |                           |                           |                           |            |
| C $\gamma$ 2                     | 0.96 (0.24)       | 2.81 (0.07)        | <b>0.21</b> (0.18 - 0.24) | <b>0.11</b> (0.06 - 0.16) | <b>0.68</b> (0.66 - 0.70) | 179        |
| Val50-C $\gamma$ 1               | 0.99 (1.16)       | 3.17 (0.05)        |                           |                           |                           |            |
| C $\gamma$ 2                     | 0.85 (1.47)       | 1.66 (0.73)        | <b>0.80</b> (0.76 - 0.82) | <b>0.00</b> (0.00 - 0.24) | <b>0.20</b> (0.00 - 0.20) | -65        |
| Val74-C $\gamma$ 1               | 1.94 (0.04)       | 0.67 (0.61)        |                           |                           |                           |            |
| C $\gamma$ 2 <sup>d</sup>        | 0                 | 2.97 (0.30)        | <b>0.23</b> (0.10 - 0.23) | <b>0.00</b> (0.00 - 0.00) | <b>0.77</b> (0.77 - 0.90) | 180        |
| Val109-C $\gamma$ 1              | 1.23 (0.53)       | 0.42 (0.38)        |                           |                           |                           |            |
| C $\gamma$ 2                     | 0.49 (0.84)       | 2.99 (0.68)        | <b>0.00</b> (0.00 - 0.09) | <b>0.28</b> (0.00 - 0.49) | <b>0.72</b> (0.51 - 0.94) | 171        |
| Val112-C $\gamma$ 1              | 1.28 (1.14)       | 0.36 (0.63)        |                           |                           |                           |            |
| C $\gamma$ 2                     | 0.51 (0.89)       | 3.11 (0.19)        | <b>0.00</b> (0.00 - 0.23) | <b>0.21</b> (0.00 - 0.27) | <b>0.79</b> (0.73 - 0.83) | 176        |
| Val115-C $\gamma$ 1              | 1.21 (0.48)       | 3.67 (0.26)        |                           |                           |                           |            |
| C $\gamma$ 2                     | 0.45 (0.78)       | 0.55 (0.96)        | <b>0.95</b> (0.85 - 1.00) | <b>0.00</b> (0.00 - 0.15) | <b>0.05</b> (0.00 - 0.05) | -55        |
| Val120-C $\gamma$ 1              | 2.15 (0.41)       | 0.18 (0.20)        |                           |                           |                           |            |
| C $\gamma$ 2                     | 0.41 (0.71)       | 2.95 (0.15)        | <b>0.00</b> (0.00 - 0.18) | <b>0.25</b> (0.00 - 0.25) | <b>0.75</b> (0.68 - 0.92) | 183        |
| Val135-C $\gamma$ 1              | 1.69 (0.59)       | 0.34 (0.49)        |                           |                           |                           |            |
| C $\gamma$ 2                     | 1.09 (1.10)       | 2.60 (0.57)        | <b>0.00</b> (0.00 - 0.10) | <b>0.32</b> (0.00 - 0.54) | <b>0.68</b> (0.46 - 1.00) | 180        |
| Val165-C $\gamma$ 1              | 1.49 (0.29)       | 0.29 (0.51)        |                           |                           |                           |            |
| C $\gamma$ 2                     | 0.73 (0.73)       | 3.67 (0.34)        | <b>0.00</b> (0.00 - 0.00) | <b>0.11</b> (0.00 - 0.18) | <b>0.89</b> (0.82 - 1.00) | 181        |
| Val169-C $\gamma$ 1              | 1.85 (0.23)       | 0.91 (0.53)        |                           |                           |                           |            |
| C $\gamma$ 2 <sup>c</sup>        |                   |                    | <b>0.12</b> (0.00 - 0.29) | <b>0.00</b> (0.00 - 0.25) | <b>0.88</b> (0.71 - 1.00) | 176        |
| Val181-C $\gamma$ 1 <sup>d</sup> | 1.30 (0.72)       | 0                  |                           |                           |                           |            |
| C $\gamma$ 2                     | 0.43 (0.74)       | 3.49 (0.47)        | <b>0.00</b> (0.00 - 0.00) | <b>0.17</b> (0.00 - 0.25) | <b>0.83</b> (0.75 - 1.00) | 189        |

<sup>a</sup> Coupling values (in Hz) represent an average over three or more measurements with standard deviations in parentheses. Rotamer populations were fit by minimizing the squared difference between measured and calculated  $^3J_{C\gamma N}$  and  $^3J_{C\gamma CO}$  couplings for each residue:  $\Sigma(1/\sigma_{meas})^2 (J_{calc} - J_{meas})^2$ , where  $\sigma$  is the standard deviation;  $p_{major}$  is shown in bold. Ranges for populations given in parentheses were calculated using  $^3J \pm \sigma$ . The populations for Val residues represents a simultaneous fit of C $\gamma$ 1 and C $\gamma$ 2 couplings when both sets are available. <sup>b</sup>  $\chi_1$  angles from the X-ray structure (4M6J). <sup>c</sup>  $^3J$  measurement not available due to overly broad resonance or overlap. <sup>d</sup> 0 valued coupling indicates measurement at limit of detection due to low signal-to-noise.

**Table S6.** Ile, Thr, Val  $^3J$  and rotamer populations for hDHF:THF <sup>a</sup>

| Residue                         | $^3J_{C\gamma N}$ | $^3J_{C\gamma CO}$ | <b>P</b> <sub>-60</sub>   | <b>P</b> <sub>+60</sub>   | <b>P</b> <sub>180</sub>   | $\chi_1^b$ |
|---------------------------------|-------------------|--------------------|---------------------------|---------------------------|---------------------------|------------|
| Ile7                            | 0.90 (1.38)       | 1.10 (1.09)        | 0.01 (0.00 - 1.00)        | 0.10 (0.00 - 0.46)        | <b>0.88</b> (0.00 - 1.00) | 198        |
| Ile16                           | 0                 | 3.71 (0.71)        | 0.00 (0.00 - 0.21)        | <b>0.96</b> (0.73 - 1.00) | 0.04 (0.00 - 0.27)        | 51         |
| Ile51                           | 1.71 (0.70)       | 1.76 (1.24)        | <b>0.70</b> (0.06 - 1.00) | 0.30 (0.00 - 0.74)        | 0.00 (0.00 - 0.94)        | -75        |
| Ile60                           | 1.44 (1.63)       | 2.33 (1.41)        | 0.46 (0.00 - 1.00)        | <b>0.54</b> (0.00 - 0.97) | 0.00 (0.00 - 0.95)        | -64        |
| Ile71                           | 2.49 (0.54)       | 1.35 (0.94)        | <b>1.00</b> (0.64 - 1.00) | 0.00 (0.00 - 0.36)        | 0.00 (0.00 - 0.06)        | -45        |
| Ile114                          | 1.85 (0.63)       | 2.48 (1.11)        | <b>0.55</b> (0.11 - 1.00) | 0.45 (0.00 - 0.89)        | 0.00 (0.00 - 0.37)        | -78        |
| Ile138                          | 1.27 (1.12)       | 0                  | 0.30 (0.00 - 1.00)        | 0.00 (0.00 - 0.06)        | <b>0.70</b> (0.00 - 0.96) | -77        |
| Ile151                          | 2.22 (0.26)       | 0                  | <b>1.00</b> (0.95 - 1.00) | 0.00 (0.00 - 0.00)        | 0.00 (0.00 - 0.05)        | -62        |
| Ile175                          | 2.39 (0.36)       | 1.67 (0.57)        | <b>0.97</b> (0.66 - 1.00) | 0.03 (0.00 - 0.34)        | 0.00 (0.00 - 0.00)        | -65        |
| Thr38 <sup>d</sup>              | 0                 | 3.32 (0.47)        | 0.00 (0.00 - 0.00)        | <b>0.98</b> (0.77 - 1.00) | 0.02 (0.00 - 0.23)        | 70         |
| Thr39                           | 0.53 (0.52)       | 1.69 (0.28)        | 0.10 (0.00 - 0.46)        | 0.28 (0.11 - 0.54)        | <b>0.63</b> (0.07 - 0.89) | -26        |
| Thr40                           | 1.27 (1.25)       | 1.21 (1.47)        | <b>0.62</b> (0.00 - 1.00) | 0.30 (0.00 - 0.69)        | 0.08 (0.00 - 0.81)        | -56        |
| Thr56 <sup>c</sup>              |                   |                    |                           |                           |                           | -56        |
| Thr100                          | 1.37 (1.19)       | 3.09 (1.18)        | 0.09 (0.00 - 0.65)        | <b>0.91</b> (0.34 - 1.00) | 0.00 (0.00 - 0.66)        | 58         |
| Thr136                          | 1.63 (1.42)       | 1.34 (1.53)        | <b>0.68</b> (0.00 - 1.00) | 0.32 (0.00 - 0.78)        | 0.00 (0.00 - 1.00)        | -53        |
| Thr146                          | 1.25 (0.22)       | 1.61 (0.90)        | <b>0.56</b> (0.28 - 0.82) | 0.44 (0.03 - 0.72)        | 0.00 (0.00 - 0.42)        | -70        |
| Val1-C $\gamma$ 1               | 1.18 (0.22)       | 2.04 (0.11)        |                           |                           |                           |            |
| C $\gamma$ 2                    | 0.50 (0.67)       | 2.35 (0.02)        | 0.47 (0.43 - 0.48)        | 0.02 (0.00 - 0.06)        | <b>0.51</b> (0.51 - 0.52) | #N/A       |
| Val8-C $\gamma$ 1               | 1.40 (0.80)       | 1.48 (1.28)        |                           |                           |                           |            |
| C $\gamma$ 2                    | 1.22 (1.08)       | 0.80 (0.80)        | 0.28 (0.00 - 0.54)        | <b>0.51</b> (0.00 - 0.67) | 0.21 (0.12 - 0.50)        | 69         |
| Val10-C $\gamma$ 1              | 0                 | 2.85 (0.27)        |                           |                           |                           |            |
| C $\gamma$ 2                    | 0.91 (0.81)       | 0                  | <b>0.70</b> (0.54 - 0.76) | 0.10 (0.10 - 0.46)        | 0.20 (0.00 - 0.20)        | -60        |
| Val43-C $\gamma$ 1              | 1.58 (0.38)       | 1.18 (0.49)        |                           |                           |                           |            |
| C $\gamma$ 2                    | 0.57 (0.53)       | 2.79 (0.16)        | 0.21 (0.03 - 0.29)        | 0.12 (0.00 - 0.33)        | <b>0.67</b> (0.64 - 0.71) | 174        |
| Val50-C $\gamma$ 1              | 1.12 (0.93)       | 2.35 (0.23)        |                           |                           |                           |            |
| C $\gamma$ 2                    | 0.88 (0.24)       | 2.12 (0.27)        | <b>0.56</b> (0.47 - 0.61) | 0.01 (0.00 - 0.17)        | 0.43 (0.36 - 0.45)        | -65        |
| Val74-C $\gamma$ 1 <sup>d</sup> | 1.49 (1.36)       | 0                  |                           |                           |                           |            |
| C $\gamma$ 2                    | 0                 | 3.09 (0.43)        | 0.00 (0.00 - 0.00)        | 0.22 (0.00 - 0.34)        | <b>0.78</b> (0.66 - 1.00) | 188        |
| Val109-C $\gamma$ 1             | 1.93 (0.20)       | 1.22 (0.67)        |                           |                           |                           |            |
| C $\gamma$ 2                    | 0.15 (0.73)       | 3.28 (0.16)        | 0.18 (0.04 - 0.20)        | 0.00 (0.00 - 0.17)        | <b>0.82</b> (0.79 - 0.87) | 190        |
| Val112-C $\gamma$ 1             | 1.97 (0.99)       | 0.41 (0.41)        |                           |                           |                           |            |
| C $\gamma$ 2                    | 0.44 (0.76)       | 3.59 (0.16)        | 0.00 (0.00 - 0.05)        | 0.07 (0.00 - 0.12)        | <b>0.93</b> (0.88 - 0.97) | 174        |
| Val115-C $\gamma$ 1             | 0.87 (1.51)       | 2.71 (0.37)        |                           |                           |                           |            |
| C $\gamma$ 2                    | 0                 | 0.81 (1.14)        | <b>0.64</b> (0.52 - 0.77) | 0.32 (0.00 - 0.38)        | 0.04 (0.04 - 0.30)        | -43        |
| Val120-C $\gamma$ 1             | 1.66 (0.63)       | 1.39 (0.35)        |                           |                           |                           |            |
| C $\gamma$ 2 <sup>c</sup>       |                   |                    | 0.28 (0.11 - 0.35)        | 0.00 (0.00 - 0.53)        | <b>0.72</b> (0.31 - 0.89) | 188        |
| Val135-C $\gamma$ 1             | 2.17 (0.67)       | 1.47 (0.70)        |                           |                           |                           |            |
| C $\gamma$ 2                    | 0                 | 2.62 (0.68)        | 0.30 (0.06 - 0.30)        | 0.08 (0.00 - 0.50)        | <b>0.61</b> (0.44 - 0.82) | 193        |
| Val165-C $\gamma$ 1             | 1.59 (1.38)       | 0                  |                           |                           |                           |            |
| C $\gamma$ 2                    | 1.15 (0.90)       | 3.66 (0.41)        | 0.00 (0.00 - 0.00)        | 0.09 (0.00 - 0.18)        | <b>0.91</b> (0.82 - 1.00) | 172        |
| Val169-C $\gamma$ 1             | 1.97 (0.19)       | 1.29 (0.32)        |                           |                           |                           |            |
| C $\gamma$ 2 <sup>c</sup>       |                   |                    | 0.14 (0.00 - 0.28)        | 0.00 (0.00 - 0.01)        | <b>0.86</b> (0.72 - 1.00) | 5          |
| Val181-C $\gamma$ 1             | 1.43 (1.33)       | 0                  |                           |                           |                           |            |
| C $\gamma$ 2                    | 1.25 (0.60)       | 3.66 (0.37)        | 0.00 (0.00 - 0.00)        | 0.10 (0.00 - 0.17)        | <b>0.90</b> (0.83 - 1.00) | 193        |

<sup>a</sup> Coupling values (in Hz) represent an average over three or more measurements with standard deviations in parentheses. Rotamer populations were fit by minimizing the squared difference between measured and calculated  $^3J_{C\gamma N}$  and  $^3J_{C\gamma CO}$  couplings for each residue:  $\Sigma(1/\sigma_{meas})^2 (J_{calc} - J_{meas})^2$ , where  $\sigma$  is the standard deviation;  $p_{major}$  is shown in bold. Ranges for populations given in parentheses were calculated using  $^3J \pm \sigma$ . The populations for Val residues represents a simultaneous fit of C $\gamma$ 1 and C $\gamma$ 2 couplings when both sets are available. <sup>b</sup>  $\chi_1$  angles from the X-ray structure (1DHF). <sup>c</sup>  $^3J$  measurement not available due to overly broad resonance or overlap. <sup>d</sup> 0 valued coupling indicates measurement at limit of detection due to low signal-to-noise.



**Table S7.** Average aromatic  $^3J$  and rotamer populations for hDHFR complexes <sup>a</sup>

| Residue               | $^3J_{C7N}$ | $^3J_{C7CO}$ | <b>P</b> <sub>-60</sub>   | <b>P</b> <sub>+60</sub>   | <b>P</b> <sub>180</sub>   | $\chi_1$ <sup>b</sup> |
|-----------------------|-------------|--------------|---------------------------|---------------------------|---------------------------|-----------------------|
| Trp24 <sup>c</sup>    |             |              |                           |                           |                           | 47 (5)                |
| Phe31 <sup>e</sup>    |             |              |                           |                           |                           | *                     |
| Tyr33                 | 2.68 (0.04) | 0.58 (0.82)  | 0.00 (0.00 - 0.00)        | 0.00 (0.00 - 0.00)        | <b>1.00</b> (1.00 - 1.00) | 172 (8)               |
| Phe34                 | 2.76 (0.51) | 0.33 (0.48)  | 0.00 (0.00 - 0.07)        | 0.00 (0.00 - 0.16)        | <b>1.00</b> (0.84 - 1.00) | 168 (3)               |
| Trp57 <sup>c</sup>    |             |              |                           |                           |                           | 170 (2)               |
| Phe58 <sup>e</sup>    |             |              |                           |                           |                           | -74 (2)               |
| His87                 | 0.45 (0.10) | 5.46 (0.47)  | <b>1.00</b> (1.00 - 1.00) | 0.00 (0.00 - 0.00)        | 0.00 (0.00 - 0.00)        | -63 (5)               |
| Phe88                 | 0.65 (0.39) | 3.92 (0.30)  | <b>0.87</b> (0.79 - 0.95) | 0.01 (0.00 - 0.21)        | 0.12 (0.00 - 0.21)        | -67 (6)               |
| Trp113                | 0.29 (0.08) | 4.08 (0.30)  | <b>0.91</b> (0.83 - 0.99) | 0.09 (0.01 - 0.17)        | 0.00 (0.00 - 0.00)        | -72 (1)               |
| Tyr121                | 0.43 (0.36) | 3.51 (1.14)  | <b>0.76</b> (0.47 - 1.00) | 0.21 (0.00 - 0.53)        | 0.02 (0.00 - 0.19)        | -76 (3)               |
| His127 <sup>d,e</sup> |             |              |                           |                           |                           | 192 (13)              |
| His130                | 2.63 (0.21) | 0.78 (1.10)  | 0.00 (0.00 - 0.14)        | 0.05 (0.00 - 0.14)        | <b>0.95</b> (0.86 - 1.00) | 187 (5)               |
| Phe134                | 0.58 (0.37) | 4.14 (0.21)  | <b>0.92</b> (0.87 - 0.98) | 0.00 (0.00 - 0.13)        | 0.08 (0.00 - 0.13)        | -70 (1)               |
| Phe142                | 0.42 (0.32) | 4.22 (0.06)  | <b>0.95</b> (0.93 - 0.96) | 0.03 (0.00 - 0.07)        | 0.02 (0.00 - 0.07)        | -76 (4)               |
| Phe147                | 0.54 (0.21) | 4.80 (0.61)  | <b>1.00</b> (0.93 - 1.00) | 0.00 (0.00 - 0.06)        | 0.00 (0.00 - 0.07)        | -58 (9)               |
| Phe148 <sup>d</sup>   | 2.70 (0.23) | n/a Pro      |                           |                           | <b>1.00</b> (0.93 - 1.00) | 191 (5)               |
| Tyr156 <sup>e</sup>   |             |              |                           |                           |                           | -76 (5)               |
| Tyr162 <sup>d</sup>   | 2.12 (0.09) | n/a Pro      |                           |                           | <b>0.78</b> (0.74 - 0.82) | 194 (7)               |
| Tyr177                | 0.64 (0.14) | 0.86 (0.88)  | 0.08 (0.00 - 0.31)        | <b>0.81</b> (0.51 - 0.95) | 0.12 (0.05 - 0.18)        | 62 (1)                |
| Phe179                | 0.78 (0.34) | 4.18 (0.41)  | <b>0.93</b> (0.82 - 1.00) | 0.00 (0.00 - 0.14)        | 0.07 (0.00 - 0.18)        | -64 (7)               |
| Tyr182                | 0.60 (0.28) | 3.81 (0.26)  | <b>0.84</b> (0.77 - 0.91) | 0.06 (0.00 - 0.23)        | 0.10 (0.00 - 0.22)        | -64 (2)               |

<sup>a</sup> Coupling values (in Hz) represent an average over all complexes with standard deviations in parentheses; complexes are excluded from average if error ranges are non overlapping or errors are larger than 1 Hz. Rotamer populations were fit by minimizing the squared difference between measured and calculated  $^3J_{C7N}$  and  $^3J_{C7CO}$  couplings for each residue:  $\Sigma(1/\sigma_{\text{meas}})^2 (J_{\text{calc}} - J_{\text{meas}})^2$ , where  $\sigma$  is the standard deviation; **p<sub>major</sub>** is shown in bold. Ranges for populations given in parentheses were calculated using  $^3J \pm \sigma$ . Rotamer averaging for aromatics is interpreted as reporting on in-well rotamer averaging and/or a skewed  $\chi_1$  conformation. <sup>b</sup> Average  $\chi_1$  angles from the X-ray structures with standard deviations in parentheses; \* indicates multiple rotamer conformations present in the X-ray structures. <sup>c</sup>  $^3J$  measurement not available due to overly broad resonance or overlap. <sup>d</sup>  $^3J_{C7CO}$  coupling is not available since the *i*+1 residue is a proline. <sup>e</sup> Unique average  $\chi_1$  conformation in one or more complexes of hDHFR.

**Table S8.** Aromatic  $^3J$  and rotamer populations for hDHFR:FOL:NADP<sup>+</sup> <sup>a</sup>

| Residue             | $^3J_{C7N}$ | $^3J_{C7CO}$ | <b>P</b> <sub>-60</sub>   | <b>P</b> <sub>+60</sub>   | <b>P</b> <sub>180</sub>   | $\chi_1$ <sup>b</sup> |
|---------------------|-------------|--------------|---------------------------|---------------------------|---------------------------|-----------------------|
| Trp24 <sup>c</sup>  |             |              |                           |                           |                           | 41                    |
| Phe31               | 0.54 (0.39) | 4.09 (0.46)  | <b>0.91</b> (0.79 - 1.00) | 0.01 (0.00 - 0.21)        | 0.07 (0.00 - 0.21)        | -89                   |
| Tyr33               | 2.66 (0.12) | 1.16 (0.60)  | 0.00 (0.00 - 0.05)        | 0.00 (0.00 - 0.03)        | <b>1.00</b> (0.95 - 1.00) | 173                   |
| Phe34               | 2.46 (0.12) | 1.01 (0.31)  | 0.07 (0.02 - 0.14)        | 0.00 (0.00 - 0.09)        | <b>0.93</b> (0.86 - 0.98) | 168                   |
| Trp57               | 2.79 (0.06) | 0.97 (0.84)  | 0.00 (0.00 - 0.00)        | 0.00 (0.00 - 0.00)        | <b>1.00</b> (1.00 - 1.00) | 170                   |
| Phe58               | 0.21 (0.33) | 4.44 (0.44)  | <b>1.00</b> (0.89 - 1.00) | 0.00 (0.00 - 0.11)        | 0.00 (0.00 - 0.07)        | -73                   |
| His87               | 0.42 (0.30) | 4.99 (0.16)  | <b>1.00</b> (0.96 - 1.00) | 0.00 (0.00 - 0.04)        | 0.00 (0.00 - 0.04)        | -59                   |
| Phe88               | 0.23 (0.27) | 4.14 (0.20)  | <b>0.92</b> (0.87 - 0.98) | 0.08 (0.00 - 0.13)        | 0.00 (0.00 - 0.05)        | -67                   |
| Trp113              | 0.21 (0.29) | 4.08 (0.30)  | <b>0.91</b> (0.83 - 0.99) | 0.09 (0.00 - 0.17)        | 0.00 (0.00 - 0.06)        | -71                   |
| Tyr121              | 0.09 (0.06) | 3.12 (0.24)  | <b>0.66</b> (0.60 - 0.72) | 0.34 (0.28 - 0.40)        | 0.00 (0.00 - 0.00)        | -76                   |
| His127 <sup>d</sup> | 2.80 (0.10) | n/a Pro      |                           |                           | <b>1.00</b> (0.98 - 1.00) | 189                   |
| His130              | 2.81 (0.08) | 1.56 (0.85)  | 0.00 (0.00 - 0.01)        | 0.00 (0.00 - 0.00)        | <b>1.00</b> (0.99 - 1.00) | 184                   |
| Phe134              | 1.16 (1.22) | 4.28 (0.12)  | <b>0.96</b> (0.93 - 0.99) | 0.00 (0.00 - 0.07)        | 0.04 (0.00 - 0.07)        | -69                   |
| Phe142              | 0.09 (0.17) | 4.18 (0.16)  | <b>0.94</b> (0.90 - 0.98) | 0.06 (0.02 - 0.10)        | 0.00 (0.00 - 0.00)        | -79                   |
| Phe147              | 0.50 (0.34) | 3.98 (1.49)  | <b>0.88</b> (0.50 - 1.00) | 0.06 (0.00 - 0.50)        | 0.06 (0.00 - 0.21)        | -66                   |
| Phe148 <sup>d</sup> | 2.51 (0.15) | n/a Pro      |                           |                           | <b>0.95</b> (0.89 - 1.00) | 194                   |
| Tyr156              | 0.08 (0.15) | 3.11 (0.46)  | <b>0.66</b> (0.54 - 0.78) | 0.34 (0.22 - 0.46)        | 0.00 (0.00 - 0.00)        | -78                   |
| Tyr162 <sup>d</sup> | 2.08 (0.04) | n/a Pro      |                           |                           | <b>0.76</b> (0.74 - 0.78) | 184, 197              |
| Tyr177              | 0.67 (0.26) | 1.76 (0.52)  | 0.31 (0.18 - 0.45)        | <b>0.56</b> (0.31 - 0.81) | 0.13 (0.02 - 0.25)        | 61                    |
| Phe179              | 0.42 (0.41) | 4.26 (0.27)  | <b>0.96</b> (0.89 - 1.00) | 0.02 (0.00 - 0.11)        | 0.02 (0.00 - 0.11)        | -60                   |
| Tyr182              | 0.83 (0.30) | 3.50 (0.56)  | <b>0.76</b> (0.61 - 0.91) | 0.04 (0.00 - 0.32)        | 0.20 (0.07 - 0.33)        | -66                   |

<sup>a</sup> Coupling values (in Hz) represent an average over three or more measurements with standard deviations in parentheses. Rotamer populations were fit by minimizing the squared difference between measured and calculated  $^3J_{C7N}$  and  $^3J_{C7CO}$  couplings for each residue:  $\Sigma(1/\sigma_{\text{meas}})^2 (J_{\text{calc}} - J_{\text{meas}})^2$ , where  $\sigma$  is the standard deviation; **p<sub>major</sub>** is shown in bold. Ranges for populations given in parentheses were calculated using  $^3J \pm \sigma$ . Rotamer averaging for aromatics is interpreted as reporting on in-well rotamer averaging and/or a skewed  $\chi_1$  conformation. <sup>b</sup>  $\chi_1$  angles from the X-ray structure (4M6K). <sup>c</sup>  $^3J$  measurement not available due to overly broad resonance or overlap. <sup>d</sup>  $^3J_{C7CO}$  coupling is not available since the *i*+1 residue is a proline.

**Table S9.** Aromatic  $^3J$  and rotamer populations for hDHFR:THF:NADP<sup>+</sup> <sup>a</sup>

| Residue             | $^3J_{C7N}$ | $^3J_{C7CO}$ | P-60                      | P+60                      | P180                      | $\chi_1$ <sup>b</sup> |
|---------------------|-------------|--------------|---------------------------|---------------------------|---------------------------|-----------------------|
| Trp24 <sup>c</sup>  |             |              |                           |                           |                           | 43                    |
| Phe31 <sup>e</sup>  | 0           | 4.06 (0.35)  | <b>0.90</b> (0.82 - 0.99) | 0.10 (0.01 - 0.18)        | 0.00 (0.00 - 0.00)        | -75                   |
| Tyr33               | 2.71 (0.06) | 1.11 (1.28)  | 0.00 (0.00 - 0.00)        | 0.00 (0.00 - 0.00)        | <b>1.00</b> (1.00 - 1.00) | 176                   |
| Phe34 <sup>e</sup>  | 2.48 (0.10) | 0            | 0.00 (0.00 - 0.00)        | 0.06 (0.02 - 0.10)        | <b>0.94</b> (0.90 - 0.98) | 170                   |
| Trp57               | 2.95 (0.13) | 0.98 (1.69)  | 0.00 (0.00 - 0.00)        | 0.00 (0.00 - 0.00)        | <b>1.00</b> (1.00 - 1.00) | 168                   |
| Phe58               | 0.17 (0.29) | 4.28 (0.19)  | <b>0.96</b> (0.91 - 1.00) | 0.04 (0.00 - 0.09)        | 0.00 (0.00 - 0.03)        | -71                   |
| His87               | 0.35 (0.31) | 5.19 (0.32)  | <b>1.00</b> (0.97 - 1.00) | 0.00 (0.00 - 0.03)        | 0.00 (0.00 - 0.03)        | -64                   |
| Phe88               | 0.43 (0.10) | 3.71 (0.39)  | <b>0.82</b> (0.71 - 0.92) | 0.16 (0.02 - 0.29)        | 0.02 (0.00 - 0.07)        | -63                   |
| Trp113              | 0.37 (0.45) | 4.84 (1.33)  | <b>1.00</b> (0.76 - 1.00) | 0.00 (0.00 - 0.24)        | 0.00 (0.00 - 0.20)        | -72                   |
| Tyr121              | 0.19 (0.32) | 2.63 (0.14)  | <b>0.54</b> (0.50 - 0.57) | 0.46 (0.37 - 0.50)        | 0.00 (0.00 - 0.06)        | -75                   |
| His127 <sup>d</sup> | 2.81 (0.03) | n/a Pro      |                           |                           | <b>1.00</b> (1.00 - 1.00) | 192                   |
| His130 <sup>e</sup> | 2.69 (0.09) | 0            | 0.00 (0.00 - 0.00)        | 0.02 (0.00 - 0.06)        | <b>0.98</b> (0.94 - 1.00) | 186                   |
| Phe134              | 0.31 (0.27) | 3.99 (0.21)  | <b>0.89</b> (0.83 - 0.94) | 0.11 (0.00 - 0.17)        | 0.00 (0.00 - 0.09)        | -71                   |
| Phe142              | 0.24 (0.35) | 4.27 (0.08)  | <b>0.96</b> (0.94 - 0.98) | 0.04 (0.00 - 0.06)        | 0.00 (0.00 - 0.06)        | -79                   |
| Phe147              | 0.36 (0.61) | 4.80 (0.61)  | <b>1.00</b> (0.94 - 1.00) | 0.00 (0.00 - 0.06)        | 0.00 (0.00 - 0.06)        | -62                   |
| Phe148 <sup>d</sup> | 2.51 (0.02) | n/a Pro      |                           |                           | <b>0.95</b> (0.94 - 0.96) | 191                   |
| Tyr156              | 0.24 (0.42) | 2.60 (0.38)  | <b>0.53</b> (0.43 - 0.62) | 0.47 (0.25 - 0.57)        | 0.00 (0.00 - 0.13)        | -75                   |
| Tyr162 <sup>d</sup> | 2.08 (0.05) | n/a Pro      |                           |                           | <b>0.76</b> (0.74 - 0.78) | 195                   |
| Tyr177 <sup>e</sup> | 0.43 (0.19) | 0            | 0.00 (0.00 - 0.00)        | <b>0.98</b> (0.89 - 1.00) | 0.02 (0.00 - 0.11)        | 63                    |
| Phe179              | 0.60 (0.34) | 4.08 (0.23)  | <b>0.91</b> (0.85 - 0.97) | 0.00 (0.00 - 0.15)        | 0.09 (0.00 - 0.15)        | -59                   |
| Tyr182              | 0.68 (0.17) | 3.75 (0.59)  | <b>0.83</b> (0.67 - 0.98) | 0.04 (0.00 - 0.27)        | 0.14 (0.02 - 0.21)        | -64                   |

<sup>a</sup> Coupling values (in Hz) represent an average over three or more measurements with standard deviations in parentheses. Rotamer populations were fit by minimizing the squared difference between measured and calculated  $^3J_{C7N}$  and  $^3J_{C7CO}$  couplings for each residue:  $\Sigma(1/\sigma_{\text{meas}})^2 (J_{\text{calc}} - J_{\text{meas}})^2$ , where  $\sigma$  is the standard deviation;  $p_{\text{major}}$  is shown in bold. Ranges for populations given in parentheses were calculated using  $^3J \pm \sigma$ . Rotamer averaging for aromatics is interpreted as reporting on in-well rotamer averaging and/or a skewed  $\chi_1$  conformation. <sup>b</sup>  $\chi_1$  angles from the X-ray structure. <sup>c</sup>  $^3J$  measurement not available due to overly broad resonance or overlap. <sup>d</sup>  $^3J_{C7CO}$  coupling is not available since the  $i+1$  residue is a proline. <sup>e</sup> 0 valued coupling indicates measurement at limit of detection due to low signal-to-noise.

**Table S10.** Aromatic  $^3J$  and rotamer populations for hDHFR:NADPH <sup>a</sup>

| Residue             | $^3J_{C7N}$ | $^3J_{C7CO}$ | P-60                      | P+60                      | P180                      | $\chi_1$ <sup>b</sup> |
|---------------------|-------------|--------------|---------------------------|---------------------------|---------------------------|-----------------------|
| Trp24 <sup>c</sup>  |             |              |                           |                           |                           | 41                    |
| Phe31               | 2.64 (0.73) | 1.20 (1.06)  | 0.03 (0.00 - 0.40)        | 0.00 (0.00 - 0.32)        | <b>0.97</b> (0.60 - 1.00) | 170                   |
| Tyr33               | 2.63 (0.47) | 1.36 (2.35)  | 0.00 (0.00 - 0.36)        | 0.00 (0.00 - 0.20)        | <b>1.00</b> (0.64 - 1.00) | 178                   |
| Phe34 <sup>e</sup>  | 3.35 (0.05) | 0            | 0.00 (0.00 - 0.00)        | 0.00 (0.00 - 0.00)        | <b>1.00</b> (1.00 - 1.00) | 172                   |
| Trp57               | 2.07 (0.12) | 1.51 (2.13)  | 0.24 (0.00 - 0.32)        | 0.00 (0.00 - 0.30)        | <b>0.76</b> (0.68 - 0.81) | 172                   |
| Phe58               | 0.76 (0.69) | 3.33 (1.68)  | <b>0.72</b> (0.28 - 1.00) | 0.11 (0.00 - 0.72)        | 0.17 (0.00 - 0.48)        | -75                   |
| His87               | 0.47 (0.81) | 6.05 (0.55)  | <b>1.00</b> (1.00 - 1.00) | 0.00 (0.00 - 0.00)        | 0.00 (0.00 - 0.00)        | -60                   |
| Phe88               | 1.07 (0.35) | 4.47 (1.09)  | <b>0.96</b> (0.66 - 1.00) | 0.00 (0.00 - 0.12)        | 0.04 (0.00 - 0.34)        | -63                   |
| Trp113              | 0.36 (0.62) | 5.20 (1.89)  | <b>1.00</b> (0.71 - 1.00) | 0.00 (0.00 - 0.29)        | 0.00 (0.00 - 0.27)        | -71                   |
| Tyr121              | 0.86 (0.74) | 5.40 (2.19)  | <b>1.00</b> (0.59 - 1.00) | 0.00 (0.00 - 0.32)        | 0.00 (0.00 - 0.41)        | -72                   |
| His127 <sup>d</sup> | 3.00 (0.27) | n/a Pro      |                           |                           | <b>1.00</b> (1.00 - 1.00) | 177                   |
| His130 <sup>c</sup> |             |              |                           |                           |                           | 194                   |
| Phe134              | 1.01 (0.88) | 4.27 (1.10)  | <b>0.95</b> (0.62 - 1.00) | 0.00 (0.00 - 0.32)        | 0.05 (0.00 - 0.38)        | -69                   |
| Phe142 <sup>c</sup> | 0.79 (0.70) |              |                           |                           | 0.18 (0.00 - 0.50)        | -72                   |
| Phe147              | 1.17 (1.35) | 4.87 (1.45)  | <b>1.00</b> (0.62 - 1.00) | 0.00 (0.00 - 0.26)        | 0.00 (0.00 - 0.38)        | -59                   |
| Phe148 <sup>d</sup> | 3.00 (0.21) | n/a Pro      |                           |                           | <b>1.00</b> (1.00 - 1.00) | 194                   |
| Tyr156              | 0.25 (0.44) | 3.84 (0.07)  | <b>0.85</b> (0.83 - 0.87) | 0.15 (0.00 - 0.17)        | 0.00 (0.00 - 0.13)        | -69                   |
| Tyr162 <sup>d</sup> | 2.25 (0.29) | n/a Pro      |                           |                           | <b>0.84</b> (0.71 - 0.96) | 196                   |
| Tyr177              | 0.70 (0.63) | 1.05 (1.23)  | 0.13 (0.00 - 0.45)        | <b>0.73</b> (0.13 - 1.00) | 0.14 (0.00 - 0.42)        | 61, 63                |
| Phe179              | 0.94 (0.35) | 3.68 (0.80)  | <b>0.80</b> (0.60 - 1.00) | 0.00 (0.00 - 0.31)        | 0.20 (0.00 - 0.40)        | -61                   |
| Tyr182              | 0.69 (0.60) | 3.87 (0.75)  | <b>0.86</b> (0.66 - 1.00) | 0.01 (0.00 - 0.34)        | 0.14 (0.00 - 0.34)        | -66                   |

<sup>a</sup> Coupling values (in Hz) represent an average over three or more measurements with standard deviations in parentheses. Rotamer populations were fit by minimizing the squared difference between measured and calculated  $^3J_{C7N}$  and  $^3J_{C7CO}$  couplings for each residue:  $\Sigma(1/\sigma_{\text{meas}})^2 (J_{\text{calc}} - J_{\text{meas}})^2$ , where  $\sigma$  is the standard deviation;  $p_{\text{major}}$  is shown in bold. Ranges for populations given in parentheses were calculated using  $^3J \pm \sigma$ . Rotamer averaging for aromatics is interpreted as reporting on in-well rotamer averaging and/or a skewed  $\chi_1$  conformation. <sup>b</sup>  $\chi_1$  angles from the X-ray structure. <sup>c</sup>  $^3J$  measurement not available due to overly broad resonance or overlap. <sup>d</sup>  $^3J_{C7CO}$  coupling is not available since the  $i+1$  residue is a proline. <sup>e</sup> 0 valued coupling indicates measurement at limit of detection due to low signal-to-noise.

**Table S11.** Aromatic  $^3J$  and rotamer populations for hDHR:THF <sup>a</sup>

| Residue             | $^3J_{C7N}$ | $^3J_{C7CO}$ | <b>p</b> <sub>-60</sub>     | <b>p</b> <sub>+60</sub>   | <b>p</b> <sub>180</sub>   | $\chi_1^b$ |
|---------------------|-------------|--------------|-----------------------------|---------------------------|---------------------------|------------|
| Trp24 <sup>c</sup>  |             |              |                             |                           |                           | 51         |
| Phe31               | 0.30 (0.47) | 4.13 (1.59)  | <b>0.92</b> (0.51 - 1.00)   | 0.08 (0.00 - 0.49)        | 0.00 (0.00 - 0.17)        | -70        |
| Tyr33 <sup>c</sup>  | 2.72 (0.28) |              |                             |                           | <b>1.00</b> (0.92 - 1.00) | 160        |
| Phe34               | 2.47 (1.69) | 0.31 (0.70)  | 0.00 (0.00 - 0.12)          | 0.07 (0.00 - 0.82)        | <b>0.93</b> (0.18 - 1.00) | 164        |
| Trp57               | 2.89 (0.51) | 1.82 (2.55)  | 0.00 (0.00 - 0.36)          | 0.00 (0.00 - 0.11)        | <b>1.00</b> (0.64 - 1.00) | 170        |
| Phe58               | 0.62 (0.84) | 4.68 (0.54)  | <b>1.00</b> (0.92 - 1.00)   | 0.00 (0.00 - 0.07)        | 0.00 (0.00 - 0.08)        | -76        |
| His87               | 0.58 (0.90) | 5.61 (0.07)  | <b>1.00</b> (0.99 - 1.00)   | 0.00 (0.00 - 0.01)        | 0.00 (0.00 - 0.00)        | -70        |
| Phe88               | 0.87 (0.73) | 3.72 (1.18)  | <b>0.81</b> (0.50 - 1.00)   | 0.00 (0.00 - 0.49)        | 0.19 (0.00 - 0.50)        | -75        |
| Trp113              | 0.24 (0.35) | 4.24 (1.77)  | <b>0.95</b> (0.49 - 1.00)   | 0.05 (0.00 - 0.51)        | 0.00 (0.00 - 0.09)        | -72        |
| Tyr121              | 0.60 (0.85) | 4.80 (0.64)  | <b>1.00</b> (0.92 - 1.00)   | 0.00 (0.00 - 0.07)        | 0.00 (0.00 - 0.08)        | -80        |
| His127 <sup>d</sup> | 2.29 (0.16) | n/a Pro      |                             |                           | <b>0.80</b> (0.73 - 0.87) | 209        |
| His130              | 2.40 (0.42) | 1.57 (1.56)  | 0.12 (0.00 - 0.40)          | 0.02 (0.00 - 0.34)        | <b>0.85</b> (0.60 - 1.00) | 184        |
| Phe134              | 0.42 (0.58) | 5.33 (1.42)  | <b>1.00</b> (0.85 - 1.00)   | 0.00 (0.00 - 0.13)        | 0.00 (0.00 - 0.15)        | -70        |
| Phe142 <sup>e</sup> | 0.57 (0.52) | >2.6 (1.83)  | > <b>0.52</b> (0.05 - 0.99) | 0.40 (0.00 - 0.95)        | 0.08 (0.00 - 0.32)        | -72        |
| Phe147              | 0.77 (0.75) | 4.28 (2.67)  | <b>0.95</b> (0.28 - 1.00)   | 0.00 (0.00 - 0.72)        | 0.05 (0.00 - 0.51)        | -46        |
| Phe148 <sup>d</sup> | 2.76 (0.37) | n/a Pro      |                             |                           | <b>1.00</b> (0.90 - 1.00) | 183        |
| Tyr156              | 0.40 (0.59) | 3.75 (1.11)  | <b>0.82</b> (0.54 - 1.00)   | 0.17 (0.00 - 0.46)        | 0.01 (0.00 - 0.27)        | -80        |
| Tyr162 <sup>d</sup> | 2.07 (0.15) | n/a Pro      |                             |                           | <b>0.76</b> (0.69 - 0.82) | 202        |
| Tyr177              | 0.75 (0.70) | 0.82 (0.81)  | 0.07 (0.00 - 0.28)          | <b>0.77</b> (0.24 - 1.00) | 0.17 (0.00 - 0.48)        | 63         |
| Phe179              | 1.18 (0.42) | 4.68 (0.83)  | <b>1.00</b> (0.78 - 1.00)   | 0.00 (0.00 - 0.00)        | 0.00 (0.00 - 0.22)        | -75        |
| Tyr182              | 0.18 (0.41) | 4.13 (0.64)  | <b>0.92</b> (0.76 - 1.00)   | 0.08 (0.00 - 0.24)        | 0.00 (0.00 - 0.10)        | -63        |

<sup>a</sup> Coupling values (in Hz) represent an average over three or more measurements with standard deviations in parentheses. Rotamer populations were fit by minimizing the squared difference between measured and calculated  $^3J_{C7N}$  and  $^3J_{C7CO}$  couplings for each residue:  $\Sigma(1/\sigma_{\text{meas}})^2 (J_{\text{calc}} - J_{\text{meas}})^2$ , where  $\sigma$  is the standard deviation; **p**<sub>major</sub> is shown in bold. Ranges for populations given in parentheses were calculated using  $^3J \pm \sigma$ . Rotamer averaging for aromatics is interpreted as reporting on in-well rotamer averaging and/or a skewed  $\chi_1$  conformation. <sup>b</sup>  $\chi_1$  angles from the X-ray structure. <sup>c</sup>  $^3J$  measurement not available due to overly broad resonance or overlap. <sup>d</sup>  $^3J_{C7CO}$  coupling is not available since the *i*+1 residue is a proline. <sup>e</sup>  $^3J_{C7CO}$  coupling is a lower bound due to resonance overlap.

**Table S12.** Leucine chemical shifts (ppm) and calculated  $\chi_2$  rotamer populations <sup>a</sup>

| Res | hE:FOL:NADP <sup>+</sup> |                    |                   |                   |                         | hE:NADPH           |                    |                   |                   |                         | hE:THF             |                    |                   |                   |                         |
|-----|--------------------------|--------------------|-------------------|-------------------|-------------------------|--------------------|--------------------|-------------------|-------------------|-------------------------|--------------------|--------------------|-------------------|-------------------|-------------------------|
|     | <sup>13</sup> C δ1       | <sup>13</sup> C δ2 | δ1 <sup>aro</sup> | δ2 <sup>aro</sup> | <b>p</b> <sub>180</sub> | <sup>13</sup> C δ1 | <sup>13</sup> C δ2 | δ1 <sup>aro</sup> | δ2 <sup>aro</sup> | <b>p</b> <sub>180</sub> | <sup>13</sup> C δ1 | <sup>13</sup> C δ2 | δ1 <sup>aro</sup> | δ2 <sup>aro</sup> | <b>p</b> <sub>180</sub> |
| 4   |                          |                    | -0.10             | -0.14             |                         |                    |                    | -0.16             | -0.52             |                         | 24.79              | 24.92              | 0.01              | -0.04             | 0.49                    |
| 22  |                          |                    | -0.02             | 0.07              |                         |                    |                    | -0.10             | -0.12             |                         |                    |                    |                   | -0.06             | -0.84                   |
| 27  | 25.48                    | 23.39              | -0.52             | -0.04             | 0.71                    | 24.79              | 23.10              | -0.53             | -0.06             | 0.67                    | 25.57              | 23.37              | -0.37             | -0.08             | 0.72                    |
| 49  |                          |                    | 0.01              | -0.04             |                         | 25.54              | 26.82              | 0.05              | 0.04              | 0.37                    | 25.17              | 26.98              | -0.01             | -0.03             | 0.32                    |
| 67  |                          |                    | 0.06              | -0.11             |                         |                    |                    | 0.15              | 0.04              |                         |                    |                    |                   | -0.03             | -0.18                   |
| 73  |                          |                    | -0.07             | -0.08             |                         |                    |                    | -0.08             | -0.09             |                         | 23.80              | 25.39              | -0.07             | -0.02             | 0.34                    |
| 75  | 26.48                    | 23.88              | -0.52             | -0.34             | 0.76                    | 26.28              | 23.80              | -0.63             | -0.43             | 0.75                    | 25.45              | 24.88              | -0.02             | -0.03             | 0.56                    |
| 79  | 25.37                    | 22.34              | 0.01              | 0.06              | 0.80                    | 25.40              | 22.32              | 0.06              | 0.1               | 0.81                    | 25.52              | 22.38              | -0.02             | 0.05              | 0.81                    |
| 89  | 24.95                    | 25.56              | -0.05             | -0.03             | 0.44                    | 25.03              | 25.53              | -0.06             | -0.02             | 0.45                    | 24.70              | 25.71              | -0.10             | -0.05             | 0.40                    |
| 93  |                          |                    | -0.01             | 0.08              |                         | 23.49              | 25.24              | -0.03             | 0.06              | 0.33                    |                    |                    |                   | -0.06             | -0.11                   |
| 97  | 25.02                    | 22.19              | -0.27             | -0.10             | 0.78                    | 23.96              | 22.11              | -0.07             | -0.09             | 0.69                    | 25.14              | 21.79              | -0.33             | -0.11             | 0.84                    |
| 99  | 24.03                    | 24.18              | -0.16             | -0.25             | 0.49                    | 23.94              | 24.26              | -0.23             | -0.76             | 0.47                    | 23.90              | 24.27              | -0.31             | -0.49             | 0.46                    |
| 105 | 24.85                    | 23.74              | -0.52             | -0.13             | 0.61                    | 24.64              | 23.77              | -0.02             | -0.1              | 0.59                    | 24.72              | 23.75              | 0.08              | -0.13             | 0.60                    |
| 131 |                          |                    | 0.05              | 0.21              |                         |                    |                    | 0.10              | 0.26              |                         |                    |                    |                   | 0.07              | 0.25                    |
| 133 | 24.87                    | 24.43              | -0.66             | -0.05             | 0.54                    | 24.74              | 24.12              | -0.58             | 0.08              | 0.56                    | 25.09              | 24.39              | -0.50             | 0.07              | 0.57                    |
| 153 | 25.61                    | 22.21              | 0.06              | 0.08              | 0.84                    | 25.47              | 22.21              | 0.08              | 0.16              | 0.83                    | 25.69              | 22.5               | 0.11              | 0.15              | 0.82                    |
| 158 | 22.23                    | 26.03              | -0.63             | -0.11             | 0.12                    | 22.08              | 25.94              | -0.58             | -0.11             | 0.11                    | 22.15              | 26.06              | -0.41             | -0.18             | 0.11                    |
| 159 | 25.83                    | 22.46              | 0.12              | 0.07              | 0.84                    | 25.81              | 22.64              | 0.08              | 0.05              | 0.82                    | 25.82              | 22.79              | 0.14              | 0.06              | 0.80                    |
| 166 | 25.54                    | 22.73              | 0.07              | 0.15              | 0.78                    | 25.13              | 23.21              | 0.03              | 0.03              | 0.69                    | 25.82              | 22.78              | 0.09              | 0.08              | 0.80                    |

<sup>a</sup> Not all leucines could be assigned. This approach for chemical shift based rotamer populations assumes there is no significant population for the leucine  $\chi_2$  -60° rotamer. The prevalence of just two  $\chi_1, \chi_2$  rotamer pairs in leucines implies a similar level of rotamer averaging for the corresponding  $\chi_1$  rotamer. The most populated  $\chi_1, \chi_2$  pairs are (-60°, 180°) and (180°, +60°). δ1<sup>aro</sup> and δ2<sup>aro</sup> are the aromatic contributions to chemical shift based on the corresponding X-ray structure using Shifts-4.3.<sup>3</sup> Populations were determined using  $^{13}\text{C}\delta_{\text{corr}} = ^{13}\text{C}\delta - \delta^{\text{aro}}$  as the corrected chemical shift (ppm).

## REFERENCES

1. Bhabha, G., Ekiert, D. C., Jennewein, M., Zmasek, C. M., Tuttle, L. M., Kroon, G., Dyson, H. J., Godzik, A., Wilson, I. A., and Wright, P. E. (2013) Divergent evolution of protein conformational dynamics in dihydrofolate reductase, *Nat Struct Mol Biol*.
2. Davies, J. F., 2nd, Delcamp, T. J., Prendergast, N. J., Ashford, V. A., Freisheim, J. H., and Kraut, J. (1990) Crystal structures of recombinant human dihydrofolate reductase complexed with folate and 5-deazafolate, *Biochemistry* 29, 9467-9479.
3. Xu, X. P., and Case, D. A. (2001) Automated prediction of <sup>15</sup>N, <sup>13</sup>C<sub>α</sub>, <sup>13</sup>C<sub>β</sub> and <sup>13</sup>C' chemical shifts in proteins using a density functional database, *J Biomol NMR* 21, 321-333.
